# Supplementary material
Source: MDPI journal article supplement (https://www.mdpi.com/2073-4344/12/9/1008)
Supplement: s1 [file s1]

# **Supplementary Materials**

## **Nickel-Catalyzed Ethylene Dimerization Based on PNP(NR<sub>2</sub>)<sub>2</sub> Ligands**

**Chengang Cao, Haonan Fan, Jingyi Zhang, Jing Ma and Tao Jiang \***

College of Chemical Engineering and Material Science, Tianjin University of  
Science and Technology, Tianjin 300457, China

\* Correspondence: [jiangtao@tust.edu.cn](mailto:jiangtao@tust.edu.cn)

## **Table of Contents**

**1. Figure S1. - S6.** NMR Spectra of complexes **1-3**

**2. Table S1.** X-ray crystallography of the complexes **1-3**

Figure S1.  $^1\text{H}$  NMR Spectrum of complex 1 ( $\text{CDCl}_3$ )

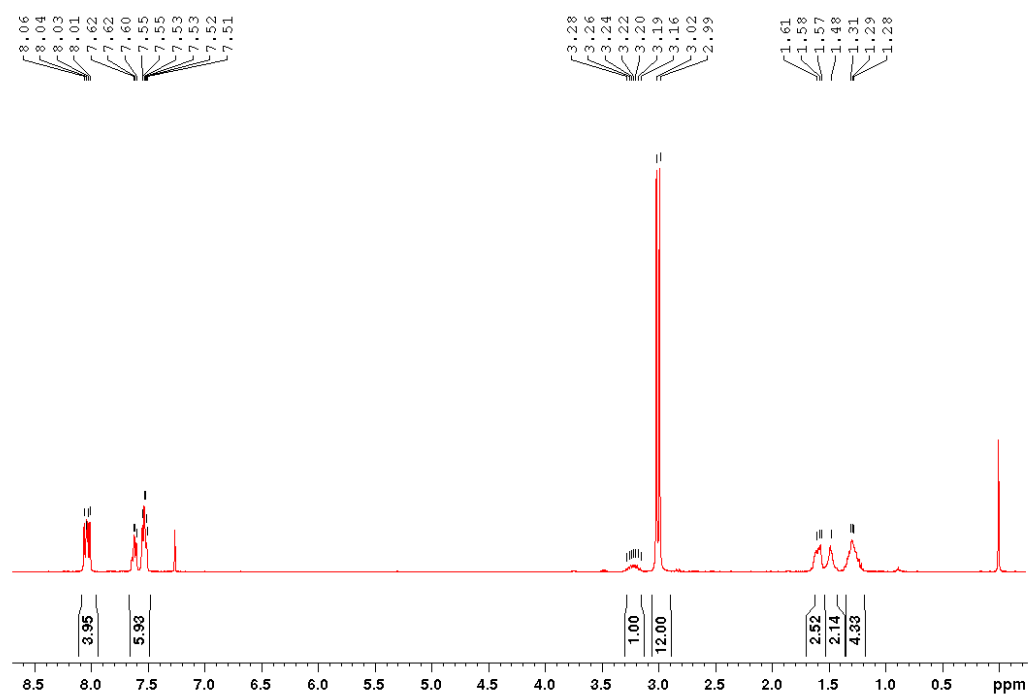

Figure S2.  $^{31}\text{P}$  NMR Spectrum of complex 1 ( $\text{CDCl}_3$ )

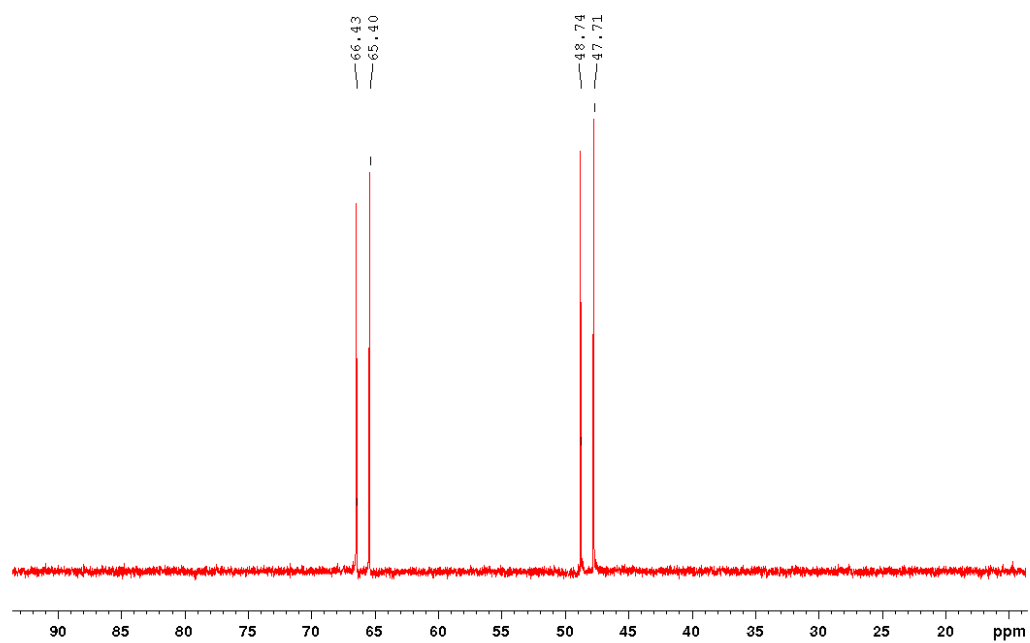

Figure S3.  $^1\text{H}$  NMR Spectrum of complex 2 ( $\text{CDCl}_3$ )

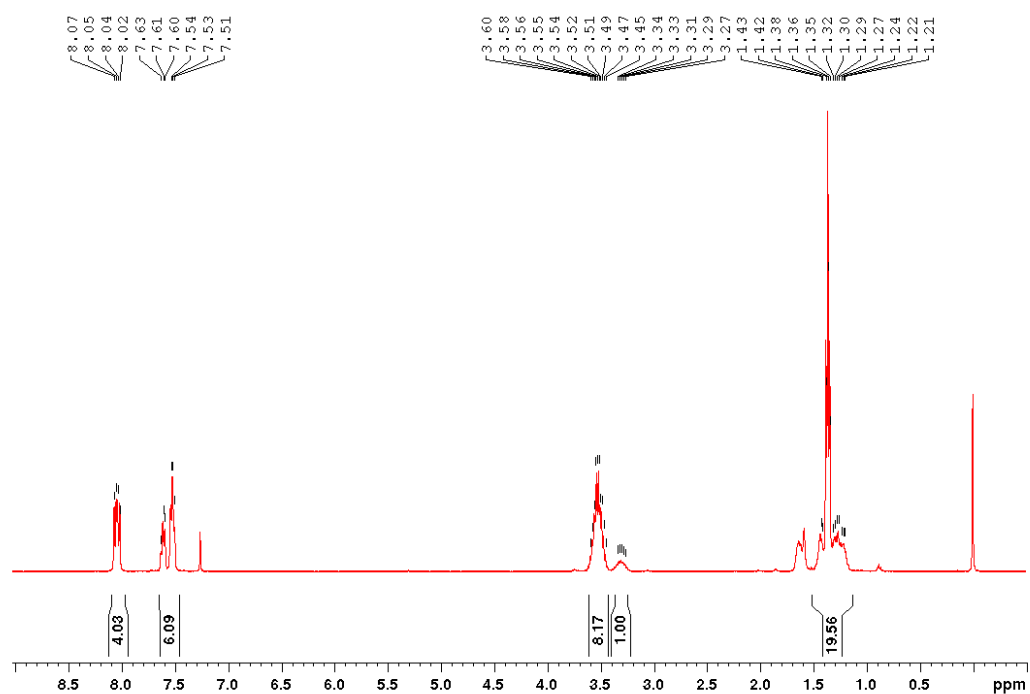

Figure S4.  $^{31}\text{P}$  NMR Spectrum of complex 2 ( $\text{CDCl}_3$ )

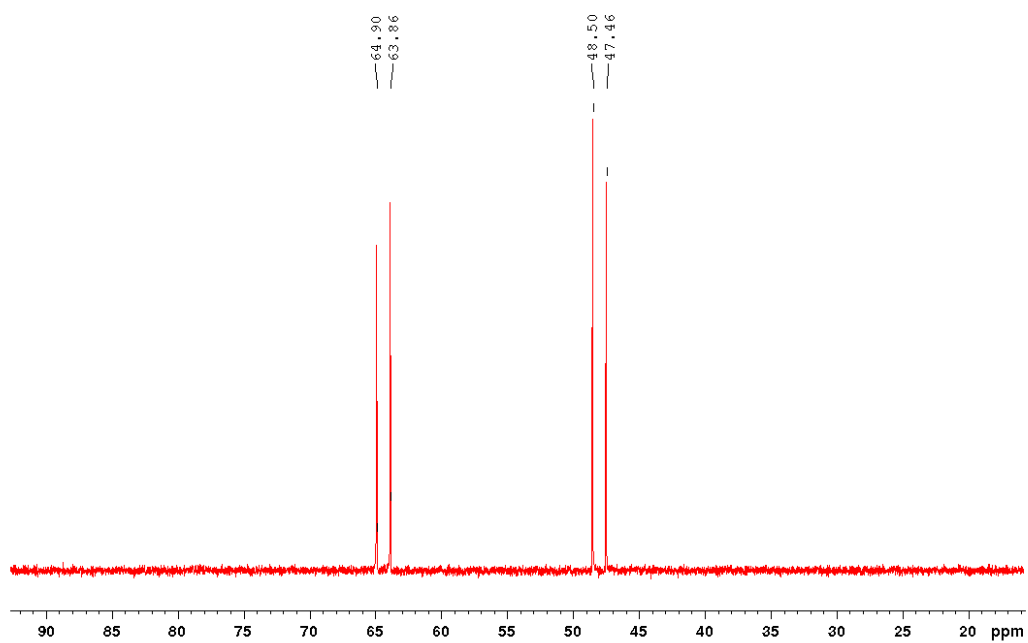

Figure S5.  $^1\text{H}$  NMR Spectrum of complex 3 ( $\text{CDCl}_3$ )

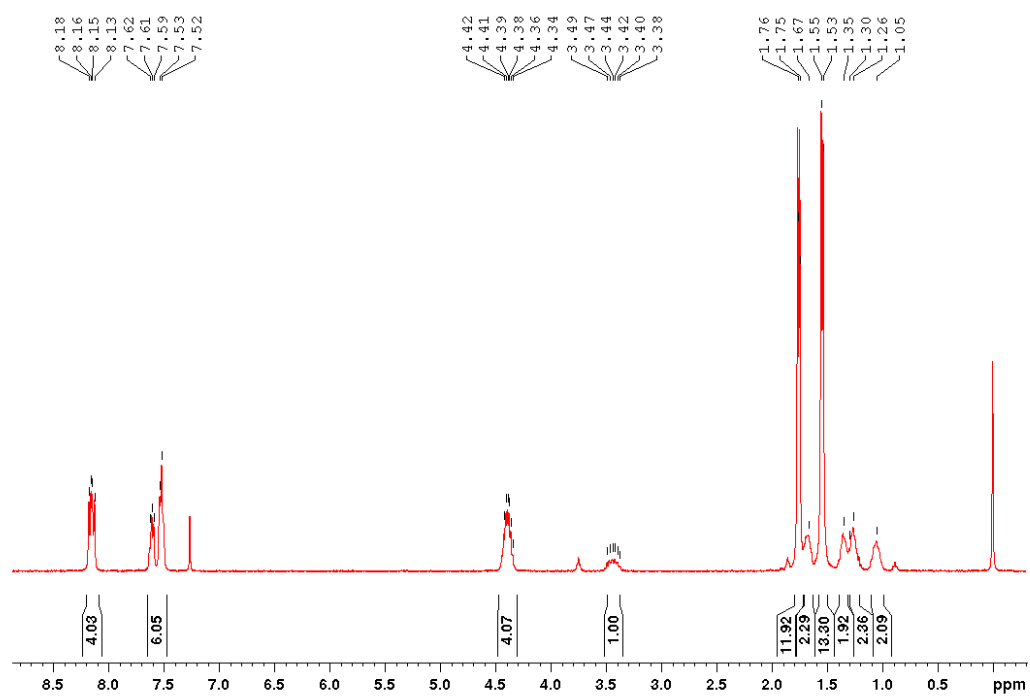

Figure S6.  $^{31}\text{P}$  NMR Spectrum of complex 3 ( $\text{CDCl}_3$ )

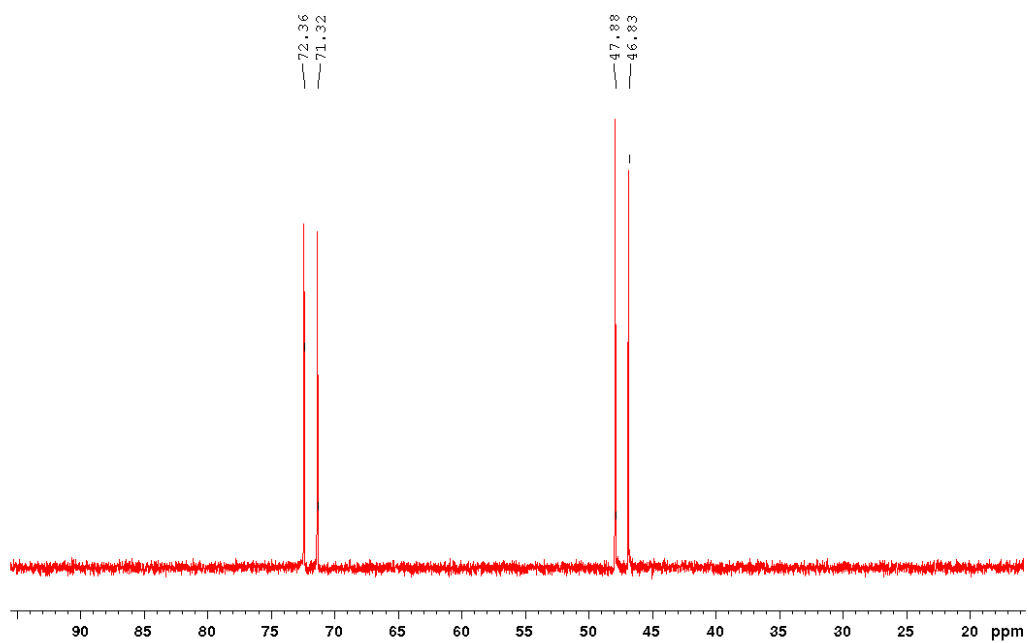



**Table S1.** Crystallographic Determination Parameters for **1-3** Complexes

| Complex                           | <b>1</b>                                                                                                      | <b>2</b>                                                                                                       | <b>3</b>                                                                                                       |
|-----------------------------------|---------------------------------------------------------------------------------------------------------------|----------------------------------------------------------------------------------------------------------------|----------------------------------------------------------------------------------------------------------------|
| Empirical formula                 | C <sub>21</sub> H <sub>31</sub> Br <sub>2</sub> N <sub>3</sub> NiP <sub>2</sub>                               | C <sub>25</sub> H <sub>39</sub> Br <sub>2</sub> N <sub>3</sub> NiP <sub>2</sub>                                | C <sub>29</sub> H <sub>47</sub> Br <sub>2</sub> N <sub>3</sub> NiP <sub>2</sub>                                |
| Formula weight                    | 605.9                                                                                                         | 662.06                                                                                                         | 718.16                                                                                                         |
| Temperature                       | 113.15                                                                                                        | 113.15                                                                                                         | 113.15                                                                                                         |
| Wavelength                        | 0.71073                                                                                                       | 0.71073                                                                                                        | 0.71073                                                                                                        |
| Crystal system, space group       | Monoclinic, P2 <sub>1</sub> /n                                                                                | Monoclinic, P2 <sub>1</sub>                                                                                    | Monoclinic, P2 <sub>1</sub>                                                                                    |
| Unit cell dimensions              | a = 9.4766(3) Å; $\alpha$ = 90°<br>b = 14.7740(4) Å; $\beta$ = 96.766(3)°<br>c = 17.6542(6) Å; $\gamma$ = 90° | a = 9.3488(4) Å; $\alpha$ = 90°<br>b = 15.3605(6) Å; $\beta$ = 103.789(4)°<br>c = 10.1924(4) Å; $\gamma$ = 90° | a = 10.1526(5) Å; $\alpha$ = 90°<br>b = 15.9976(9) Å; $\beta$ = 94.360(4)°<br>c = 19.0343(8) Å; $\gamma$ = 90° |
| Volume                            | 2454.50(13)                                                                                                   | 1421.47(10)                                                                                                    | 3082.6(3)                                                                                                      |
| Z, Calculated density             | 4, 1.640 g·cm <sup>-3</sup>                                                                                   | 2, 1.547 g·cm <sup>-3</sup>                                                                                    | 4, 1.547 g·cm <sup>-3</sup>                                                                                    |
| Absorption coefficient            | 4.190                                                                                                         | 3.625                                                                                                          | 3.349                                                                                                          |
| F(000)                            | 1224.0                                                                                                        | 676.0                                                                                                          | 1480.0                                                                                                         |
| Theta range for data collection   | 4.646 to 65.878°                                                                                              | 4.114 to 65.76°                                                                                                | 4.024 to 56.564°                                                                                               |
| Limiting indices                  | -13 ≤ h ≤ 13<br>-21 ≤ k ≤ 21<br>-25 ≤ l ≤ 26                                                                  | -13 ≤ h ≤ 14<br>-20 ≤ k ≤ 22<br>-15 ≤ l ≤ 15                                                                   | -13 ≤ h ≤ 13<br>-21 ≤ k ≤ 20<br>-24 ≤ l ≤ 25                                                                   |
| Reflections collected/unique      | 30638/8544[R(int)=0.0563]                                                                                     | 18043/8291[R(int)=0.0509]                                                                                      | 31127/7651[R(int)=0.0825]                                                                                      |
| Refinement method                 | Full-matrix least-squares on F <sup>2</sup>                                                                   | Full-matrix least-squares on F <sup>2</sup>                                                                    | Full-matrix least-squares on F <sup>2</sup>                                                                    |
| Data/restraints/parameters        | 8544/250/313                                                                                                  | 8291/1/303                                                                                                     | 7651/0/343                                                                                                     |
| Goodness-of-fit on F <sup>2</sup> | 1.024                                                                                                         | 1.002                                                                                                          | 1.013                                                                                                          |
| Final R indices [I > 2sigma(I)]   | R <sub>1</sub> = 0.0460, wR <sub>2</sub> = 0.0920                                                             | R <sub>1</sub> = 0.0433, wR <sub>2</sub> = 0.0791                                                              | R <sub>1</sub> = 0.0454, wR <sub>2</sub> = 0.0778                                                              |
| R indices (all data)              | R <sub>1</sub> = 0.0767, wR <sub>2</sub> = 0.1049                                                             | R <sub>1</sub> = 0.0617, wR <sub>2</sub> = 0.0880                                                              | R <sub>1</sub> = 0.0844, wR <sub>2</sub> = 0.0894                                                              |
